1 Title

2 Lineage specific histories of *Mycobacterium tuberculosis* dispersal in Africa and Eurasia

3

4 Author Affiliation

5 Mary B O'Neill<sup>a,b,\*</sup>, Abigail Shockey<sup>b</sup>, Alex Zarley<sup>c</sup>, William Aylward<sup>d</sup>, Vegard Eldholm<sup>e</sup>, Andrew  
6 Kitchen<sup>f</sup>, Caitlin S Pepperell<sup>b,g</sup>

7

8 <sup>a</sup>Laboratory of Genetics, University of Wisconsin-Madison, Madison, WI 53706, USA

9 <sup>b</sup>Department of Medical Microbiology and Immunology, University of Wisconsin-Madison,  
10 Madison, WI 53706, USA

11 <sup>c</sup>Department of Geography, University of Wisconsin-Madison, WI 53706, USA

12 <sup>d</sup>Department of Classical and Ancient Near Eastern Studies, University of Wisconsin-Madison,  
13 Madison, WI 53706, USA

14 <sup>e</sup>Infection Control and Environmental Health, Norwegian Institute of Public Health, 0456 Oslo,  
15 Norway

16 <sup>f</sup>Department of Anthropology, University of Iowa, Iowa City, IA 52242, USA

17 <sup>g</sup>Department of Medicine, University of Wisconsin-Madison, Madison, WI 53706, USA

18 \*Present address: Unit of Human Evolutionary Genetics, Institut Pasteur, 75015 Paris, France

19

20 Corresponding Authors

21 Caitlin S Pepperell

22 1550 Linden Drive

23 5301 Microbial Sciences Building

24 Madison, WI 53706

25 (608) 262-5983

26 [cspepper@medicine.wisc.edu](mailto:cspepper@medicine.wisc.edu)

27

28 Andrew Kitchen

29 17 N. Clinton Street

30 114 Macbride Hall

31 Iowa City, Iowa 52242

32 (319) 335-2891

33 [andrew-kitchen@uiowa.edu](mailto:andrew-kitchen@uiowa.edu)

34

35 Keywords

36 phylogeography, evolution, pathogen, migration, demography

37

## 38 Abstract

39 *Mycobacterium tuberculosis* (*M.tb*) is a globally distributed, obligate pathogen of humans that  
40 can be divided into seven clearly defined lineages. Identifying how the ancestral clone of *M.tb*  
41 spread and differentiated is important for identifying the ecological drivers of the current  
42 pandemic. We reconstructed *M.tb* migration in Africa and Eurasia, and investigated lineage  
43 specific patterns of spread. Applying evolutionary rates inferred with ancient *M.tb* genome  
44 calibration, we link *M.tb* dispersal to historical phenomena that altered patterns of connectivity  
45 throughout Africa and Eurasia: trans-Indian Ocean trade in spices and other goods, the Silk  
46 Road and its predecessors, the expansion of the Roman Empire and, the European Age of  
47 Exploration. We find that Eastern Africa and Southeast Asia have been critical in the dispersal  
48 of *M.tb*. Our results reveal complex relationships between spatial dispersal and expansion of  
49 *M.tb* populations, and delineate the independent evolutionary trajectories of bacterial sub-  
50 populations underlying the current pandemic.

51

## 52 Introduction

53 The history of tuberculosis (TB) has been rewritten several times as genetic data accumulate  
54 from its causative agent, *Mycobacterium tuberculosis* (*M.tb*). In the nascent genomic era, these  
55 data refuted the long-held hypothesis that human-adapted *M.tb* emerged from an animal  
56 adapted genetic background represented among extant bacteria by *Mycobacterium bovis*,  
57 another member of the *Mycobacterium tuberculosis* complex (MTBC) (Brosch et al. 2002).  
58 Genetic data from bacteria infecting multiple species of hosts revealed that currently known  
59 non-primate-adapted strains form a nested clade within the diversity of extant *M.tb* (Behr et al.  
60 1999; Brosch et al. 2002; Hershberg et al. 2008).

61

62 *M.tb* can be classified into seven well-differentiated lineages, which differ in their geographic  
63 distribution and association with human sub-populations (Hirsh et al. 2004; Gagneux et al.  
64 2006). This observation led to the hypothesis that *M.tb* diversity has been shaped by human  
65 migrations out of Africa, and that the most recent common ancestor (MRCA) of extant *M.tb*  
66 emerged in Africa approximately 73,000 years ago, coincident with estimated waves of human  
67 migration (Comas et al. 2013). Human out of Africa migrations are a plausible means by which  
68 *M.tb* could have spread globally. However, several features of *M.tb* population genetics suggest  
69 it has diversified over relatively short time scales: for example, the species is characterized by  
70 low genetic diversity (Eldholm and Balloux 2016) and high rates of non-synonymous  
71 polymorphism (Rocha et al. 2006).

72  
73 The observation of limited diversity among extant *M.tb* could be reconciled with the out of Africa  
74 scenario if *M.tb*'s rate of evolution were orders of magnitude lower than estimates from other  
75 bacterial pathogens, or if *M.tb* exhibited dramatic rate decay such that substitution rates varied  
76 by several orders of magnitude as a function of temporal sampling window (Comas et al. 2013;  
77 Eldholm and Balloux 2016). There are at least nine published estimates of the rate of *M.tb*  
78 molecular evolution, which use a variety of calibration methods (Eldholm et al. 2016). Rate  
79 estimates calibrated with sampling dates, historical events, experimental infection in non-human  
80 primates, recent transmission events, and ancient DNA are concordant. Critically, *M.tb* rate  
81 estimates are similar to those of other bacterial species, and are inconsistent with the out of  
82 Africa hypothesis. In addition, a recent meta-analysis of evolutionary rate estimates in bacteria  
83 noted that 'reliable rate estimates for *M. tuberculosis*, estimated over sampling frames of 15 and  
84 895 years, were nearly identical' (Duchêne et al. 2016), suggesting that *M.tb* is not  
85 characterized by the dramatic rate decay that would be needed to reconcile observed data with  
86 the out of Africa hypothesis.

87  
88 When calibrated with ancient DNA, the estimates of the time to most recent common ancestor  
89 (TMRCA) for the MTBC are <6,000 years before present (Bos et al. 2014; Kay et al. 2015).  
90 This is not necessarily the time period over which TB first emerged, as it is possible –  
91 particularly given the apparent absence of recombination among *M.tb* (Pepperell et al. 2013) –  
92 that the global population has undergone clonal replacement events that displaced ancient  
93 diversity from the species.

94  
95 *M.tb* is an obligate pathogen of humans with a global geographic range. The finding of a recent  
96 origin for the extant *M.tb* population raises the question of how the organism could have spread  
97 within this timeframe to occupy its current distribution. *M.tb* populations in the Americas show  
98 the impacts of European colonial movements as well as recent immigration (e.g. Pepperell et al.  
99 2011); the role of other historical phenomena in driving TB dispersal is not well understood.  
100 Here we sought to reconstruct the migratory history of *M.tb* populations in Africa and Eurasia  
101 within the newly established framework of a recent origin and evolutionary rates derived from  
102 ancient DNA data (Bos et al. 2014; Kay et al. 2015). We discovered lineage-specific patterns of  
103 migration and a complex relationship between *M.tb* effective population growth and migration.  
104 Our results connect *M.tb* migration to major historical events in human history that altered  
105 patterns of connectivity in Africa and Eurasia. These findings provide context for a recent

106 evolutionary origin of the MRCA of *M.tb* (Pepperell et al. 2013; Bos et al. 2014; Kay et al. 2015),  
107 which represents yet another paradigm shift in our understanding of the history and origin of this  
108 successful pathogen.

109

## 110 Results

### 111 ***Genetic and geographic structures of global *M.tb* populations***

112 In order to establish the contemporary geographic distributions of *M.tb* lineages, we translated  
113 the spoligotypes reported for 42,358 *M.tb* isolates to their corresponding lineage designations  
114 (fig. 1). Geographic patterns in prevalence vary between lineages. Lineage 1 (L1) is prevalent  
115 in regions bordering the Indian Ocean, extending from Eastern Africa to Melanesia. Lineage 2  
116 (L2) is broadly distributed, with a predominance in Eastern Eurasia and South East Asia.  
117 Lineage 3 (L3) is similar to L1 in that its distribution rings the Indian Ocean, but it does not  
118 extend into Southeastern Asia, it has a stronger presence in Northern Africa, and a broader  
119 distribution across Southern Asia. Lineage 4 (L4) is strikingly well dispersed, with a  
120 predominance throughout Africa and Europe and the entire region bordering the Mediterranean.  
121 Lineages 5 (L5) and 6 (L6) are found at low frequencies in Western and Northern Africa.  
122 Lineage 7 (L7), as previously described (Blouin et al. 2012; Firdessa et al. 2013; Comas et al.  
123 2015), is limited to Ethiopia.

124

125 We compiled a diverse collection of *M.tb* genomes for phylogenetic and population genetic  
126 inference of the demographic and migratory history of the extant *M.tb* population (*see Methods*).  
127 Our dataset consists of whole-genome sequences (WGS) from 552 *M.tb* isolates collected from  
128 51 countries (spanning 13 UN geoscheme subregions), which we refer to as the Old World  
129 collection (fig. s1, table s1). We included sites in the alignment where at least half of these  
130 isolates had confident data (60,787 variant sites; 3,838,249 bp) for subsequent analyses, unless  
131 otherwise noted.

132

133 The inferred maximum likelihood phylogeny and Bayesian clustering analysis reveals the well  
134 described *M.tb* lineage structure, and some associations are evident between lineages and  
135 geographic regions (defined here by the United Nations geoscheme) (fig. s2). The phylogeny  
136 has an unbalanced shape, with long internal branches that define the lineages and feathery tips,  
137 suggestive of recent population expansion.

138

139 Genetic diversity, as measured by the numbers of segregating sites and pairwise differences  
140 (Watterson's  $\theta$  and  $\pi$ ), varied among lineages (table 1). L1 and L4 group together and have  
141 the highest diversity; L2, L3, L5, and L6 have similar levels of diversity and form the middle  
142 grouping; L7 has the lowest diversity. We used an analysis of molecular variance (AMOVA) to  
143 delineate the effects of population sub-division on *M.tb* diversity (table 1). The Old World  
144 collection was highly structured among UN subregions (21% of variation attributable to  
145 between-region comparisons), whereas this structure was less apparent when regions were  
146 defined by the botanical contents outlined by the World geographic scheme for recording plant  
147 distributions (14%). This is consistent with *M.tb*'s niche as an obligate human pathogen, with  
148 bacterial population structure directly shaped by that of its host population (i.e. reflected in UN  
149 subregions) rather than climatic and other environmental features (reflected in botanical  
150 continent definitions). We obtained similar results when the lineages were considered  
151 separately, except for L4, which had little evidence of population structure (4% variation among  
152 UN subregions, 2% among botanical continents).

153

#### 154 ***Distinct demographic histories of the M.tb lineages***

155 Bayesian inferred trees vary among lineages (fig. 2), likely reflecting their distinct demographic  
156 histories. Branch lengths are relatively even across the phylogenies of L1 and L4, whereas L2  
157 and L3 have a less balanced structure. The long, sparse internal branches and radiating tips of  
158 L2 and L3 phylogenies are consistent with an early history during which the effective population  
159 size remained small (and diversity was lost to drift), followed by more recent population  
160 expansion. L5 has a star-like structure, consistent with rapid population expansion. Jointly  
161 inferred Bayesian skyline plot (BSP) reconstructions of effective population sizes over time  
162 suggest that lineages 1-6 have undergone expansion (fig. 3 – top panel, fig. S3). We estimate  
163 that L2 and L3 underwent abrupt expansion at approximately the same time, whereas  
164 expansions of L1 and L4 appeared relatively smooth.

165

166 We used the methods implemented in *∂a∂i* to reconstruct the demographic histories of each  
167 *M.tb* population (i.e. lineage) from its synonymous site frequency spectrum (SFS). As  
168 demographic inference with *∂a∂i* is sensitive to missing data, loci at which any sequence in the  
169 individual lineage alignments had a gap or unknown character were removed for these  
170 analyses. Consistent with the BSP analyses performed in BEAST, instantaneous expansion  
171 and exponential growth models offered an improved fit to the data in comparison with the  
172 constant population size model for each lineage and the entire Old World collection (fig. S4).

173 Parameter estimates varied widely across runs for the exponential growth model, so we report  
174 results only for the instantaneous expansion model (table 1).

175

### 176 ***Major events in *M.tb*'s migratory history***

177 There was evidence of isolation by distance in the global *M.tb* population, as assessed with a  
178 Mantel test of correlations between genetic and geographic distances. We defined geographic  
179 distances using three schemes: great circle distances, great circle distances through waypoints  
180 of human migration as described in (Ramachandran et al. 2005), and distances along historical  
181 trade routes. Waypoints are used to make distance estimates more reflective of presumed  
182 human migration patterns (i.e., when calculating between-continent distances, it is generally  
183 thought that humans did not pass through large bodies of water, and thus a waypoint is used).  
184 To allow comparisons between the schemes, values were centered and standardized (see  
185 *Methods*). Values of the Mantel test statistic were similar for great circle distances ( $r = 0.16$ )  
186 and trade network distances ( $r = 0.16$ ), with distances through waypoints reflective of human  
187 migration patterns having a lower value ( $r = 0.14$ ,  $p = 0.0001$  for all three analyses). In analyses  
188 of human genetic data, adjustment of great circle distances with waypoints results in a higher  
189 correlation between genetic and geographic distances (Ramachandran et al. 2005). Our Mantel  
190 test results therefore do not support a pattern of isolation by distance as expected if out of Africa  
191 human migrations were the primary influence on global diversity of extant *M.tb* (Comas et al.  
192 2013).

193

194 To further investigate a potential influence of ancient human migration on *M.tb* evolution, we  
195 calculated the correlation between *M.tb* genetic diversity ( $\pi$ ) within subregions and their  
196 average distances from Addis Ababa, a proxy for a possible origin of anatomically modern  
197 human expansion out of Africa. Contrary to what is observed for human population diversity  
198 (Ramachandran et al. 2005), we did not observe a significant decline in *M.tb* diversity as a  
199 function of distance in our Old World collection (adjusted R-squared =  $-0.1$ ,  $p = 0.88$ ), nor when  
200 we included samples from the Americas (adjusted R-squared =  $8.9 \times 10^{-4}$ ,  $p = 0.34$ , fig. S5,  
201 table S2).

202

203 We used the methods implemented in BEAST to reconstruct the migratory history of the entire  
204 Old World *M.tb* collection as well as individual lineages within it, modelling geographic origin of  
205 isolates (UN subregion or country) as a discrete trait (fig. 4, figs. S6-S10). Using an  
206 evolutionary rate calibrated with 18<sup>th</sup> century *M.tb* DNA of  $5 \times 10^{-8}$  substitutions/site/year (Kay et

207 al. 2015), which is similar to the rate inferred with data from 1,000 year old specimens (Bos et  
208 al. 2014), our estimate of the time to most recent common ancestor for extant *M.tb* is between  
209 4032 BCE and 2172 BCE (table 1; date ranges are based on the upper and lower limits of the  
210 95% highest posterior density (HPD) for the rate reported in Kay et al. (2015) which is more  
211 conservative than the 95% HPD of our model). We infer an African origin for the MRCA  
212 (Eastern or Western subregion, table 1, fig. 4, fig. S6). Shortly after emergence of the common  
213 ancestor, we infer a migration of the L1-L2-L3-L4-L7 ancestral lineage from Western to Eastern  
214 Africa (we estimate prior to 2683 BCE), with subsequent migrations occurring out of Eastern  
215 Africa.

216  
217 In our phylogeographic reconstruction, emergence of L1 follows migration from Eastern Africa to  
218 Southern Asia at some time between the 3<sup>rd</sup> millennium and 4<sup>th</sup> century BCE (table 1, fig. 4, fig.  
219 S6). L1 has an 'out of India' phylogeographic pattern (fig. S7), with diverse Indian lineages  
220 interspersed throughout the phylogeny. This suggests that the current distribution of L1 around  
221 the Indian Ocean (fig. 1) arose from migrations out of India, from a pool of bacterial lineages  
222 that diversified following migration from Eastern Africa.

223  
224 The phylogeographic reconstruction further indicates that following the divergence of L1, *M.tb*  
225 continued to diversify in Eastern Africa, with emergence of L7 there, followed by L4 (table 1, fig.  
226 4, fig. S6). The contemporary distribution of L4 is extremely broad (fig. 1) and in this analysis of  
227 the Old World collection we infer an East African location for the internal branches of L4.  
228 Notably, in the lineage-specific analyses, we infer a European location for these branches (fig.  
229 S7). The difference is likely due to the fact that inference is informed by deeper as well as  
230 descendant nodes in the Old World collection. Together, these results imply close ties between  
231 Europe and Africa during the early history of this lineage that we estimate emerged in the 1<sup>st</sup>  
232 century CE (368 BCE-362 CE, table 1).

233  
234 After the emergence of L1 and L7 from Eastern Africa, our analyses suggest that a migration  
235 occurring between 697 BCE and 520 CE established L3 in Southern Asia, with subsequent  
236 dispersal out of Southern Asia into its present distribution, which includes Eastern Africa (i.e., a  
237 back migration of L3 to Africa, fig. 1). We estimate that L2 diversified in South Eastern Asia  
238 following migration from Eastern Africa at some point between 697 BCE and 20 BCE (table 1,  
239 fig. 4, fig. S6). A previously published analysis of L2 phylogeography also inferred a Southeast  
240 Asian origin for the lineage (Luo et al. 2015).

241

242 ***Lineage and region specific patterns of migration***

243 Our phylogeographic reconstruction indicated that temporal trends in migration varied among  
244 lineages (fig. 3 – bottom panel). We infer that L1 was characterized by high levels of migration  
245 until approximately the 7<sup>th</sup> century CE, when the rate of migration decreased abruptly and  
246 remained stable thereafter. L3, by contrast, exhibited consistently low rates of migration. L2  
247 and L4 had more variable trends in migration, as each underwent punctuated increases in  
248 migration rate. Temporal trends in growth and migration are congruent for L2 and L4, with  
249 increases in migration rate preceding effective population expansions; this is not the case for L1  
250 and L3. Taken together, these results suggest that L1 and L3 populations (as well as L5 and  
251 L6, fig. S3b) grew *in situ*, whereas range expansion may have contributed to the growth of L2  
252 and L4.

253

254 We employed the Bayesian stochastic search variable selection method (BSSVS) in BEAST  
255 (Lemey et al. 2009) to estimate relative migration rates within the most parsimonious migration  
256 matrix. A map showing inferred patterns of connectivity among UN subregions and relative  
257 rates of *M.tb* migration with strong posterior support is shown in fig. 5. South Eastern Asia was  
258 the most connected region in our analyses, with significant rates of migration connecting it to  
259 eight other regions. Eastern Africa, Eastern Europe, and Southern Asia were also highly  
260 connected, with significant rates with six, six, and five other regions, respectively. Western  
261 Africa, Eastern Asia, and Western Asia were the least connected regions, with just one  
262 significant connection each (to Eastern Africa, South Eastern Asia, and Eastern Europe,  
263 respectively). Our sample from Western Asia is, however, limited (table S1) and migration from  
264 this region may have consequently been underestimated. The highest rates of migration were  
265 seen between Eastern Asia and Southeastern Asia, and between Eastern Africa and Southern  
266 Asia.

267

268 Lineage specific analyses suggest that migration between Southern Asia, Eastern Africa, and  
269 South Eastern Asia has been important for the dispersal of L1, whereas South Eastern Asia and  
270 Eastern Europe have been important for L2 (fig. S11). L3 is similar to L1 in that there is  
271 evidence of relatively high rates of migration between Southern Asia and Eastern Africa. There  
272 is also evidence of migration within Africa between the eastern and southern subregions. In the  
273 analyses of migration for L4, Eastern Africa appeared highly connected with other regions.

274



## 275 ***Phylogeographic reconstruction: limitations and alternatives***

276 These phylogeographic reconstructions are clearly sensitive to sampling, since we cannot  
277 identify the roles of unsampled regions in *M.tb*'s migratory history. We maximized geographic  
278 diversity in our sample, but were limited by available data and some regions – notably Middle  
279 Africa, Northern Africa, and Western Asia – are absent or underrepresented in our sample (fig.  
280 S1). Defining the contributions of these undersampled regions to *M.tb*'s migratory history awaits  
281 more samples and/or further method development.

282

283 De Maio *et al.* (2015) note the sensitivity of discrete trait phylogeographic inference in BEAST to  
284 sample selection, as well as overconfidence in the precision of geographic inference, and  
285 propose BASTA as an alternative (De Maio *et al.* 2015). BASTA is sensitive to the choice of  
286 prior and we did not have ancillary data to guide the selection of a prior for the Old World  
287 migratory history of *M.tb*, precluding its use here. We investigated *∂a∂i* as an alternative tool for  
288 phylogeographic inference but it did not perform well for this application under conditions of  
289 complete linkage of sites (Note S1, fig. S12, fig. S13, table S3, table S4). Lapierre *et al.* (2016)  
290 investigated the sensitivity of BEAST inference of demography to sampling regime. They found  
291 that the method performed poorly under a 'uniform' sub-sampling regime, in which populations  
292 are randomly sampled to the same size (Lapierre *et al.* 2016). Our results are concordant with  
293 Lapierre *et al.* (2016), in that we found inferred migration matrices were not consistent across  
294 random sub-samples of our dataset (fig. S14). We also interrogated the relationship between  
295 regional sample size and inferred migration rate and did not observe a strong correlation (fig.  
296 S14). The phylogeographic inference method implemented here relies on the assumption that  
297 sample size reflects deme size (Lemey *et al.* 2009; De Maio *et al.* 2015), and within the  
298 constraints of available data, we attempted to adjust our sample sizes according the regional  
299 prevalence of TB (see *Methods* and fig. S1). According to the classifications proposed by  
300 Lapierre *et al.* (2015), our Old World collection represents a 'mixed' sampling scheme (see  
301 *Methods*).

302

303 We previously demonstrated effects of population expansion, linkage, and purifying selection on  
304 *M.tb* genetic diversity (Pepperell *et al.* 2013). Given these previous observations, we were  
305 curious about a potential impact of purifying selection on inference of migration. To address this  
306 question, we simulated data under demographic models with and without selection and  
307 migration, and then analyzed the resulting sequence alignments in BEAST. Our two population  
308 simulation suggests that purifying selection may elevate estimated migration rates, though the

309 distribution of mean rate estimates for simulations with and without purifying selection broadly  
310 overlap (fig. S15). However, analysis of sequence alignments generated under a three  
311 population model suggested that selection had a statistically negligible effect on migration rates,  
312 which can be observed from plots of the mean relative rates (fig. S16) or of the relative support  
313 of migration rates (fig. S17). We note that the discrete migration model implemented in BEAST  
314 was able to capture much of the asymmetry of our three population asymmetrical simulations as  
315 evidenced by the distribution of relative migration rates and Bayes factor (BF) support for said  
316 rates. BEAST also consistently produced similar BF support for rates estimated from data  
317 simulated under symmetrical migration models (i.e., those with global  $M = 0.5$  or  $0.0$ ). Our  
318 simulations thus suggest that consistent purifying selection is unlikely to dramatically affect  
319 estimates of, or support for, migration rates between populations in these scenarios.

320

## 321 Discussion

322 Our reconstructions of *M.tb* dispersal throughout the Old World delineate a complex migratory  
323 history that varies substantially between bacterial lineages. Patterns of diversity among extant  
324 *M.tb* suggest that historical pathogen populations were capable of moving fluidly over vast  
325 distances. Using evolutionary rate estimates from ancient DNA calibration, we time the  
326 dispersal of *M.tb* to a historical period of exploration, trade, and increased connectivity among  
327 regions of the Old World.

328

329 Consistent with prior reports (Comas et al. 2013), we infer an origin of *M.tb* on the African  
330 continent (table 1, fig. 4, fig. S6). There is a modest preference for Western Africa over Eastern  
331 Africa (54% versus 38% inferred probability), likely due to the early branching West African  
332 lineages (i.e. *Mycobacterium africanum*, L5 and L6). Larger samples may allow more precise  
333 localization of the *M.tb* MRCA, and Northern Africa in particular is under-studied.

334

335 We infer L1 to be the first lineage that emerged out of Africa; L1 is currently concentrated in  
336 regions bordering the Indian Ocean from Eastern Africa to Melanesia (fig. 1). In our  
337 phylogeographic reconstruction, the genesis of this lineage traces to migration from Eastern  
338 Africa to Southern Asia at some point between the 3<sup>rd</sup> millennium and 4<sup>th</sup> century BCE, with  
339 subsequent dispersal occurring out of the Indian subcontinent. Our results suggest that the  
340 early history of L1 was characterized by high levels of migration, particularly between Southern  
341 Asia and Eastern Africa, and between Southern Asia and South Eastern Asia (fig. 3, fig. S11).  
342 The geographic distribution of L1, the timing of its emergence and spread, as well as patterns of

343 connectivity underlying its dispersal, are all consistent with migration via established trans-  
344 Indian Ocean trade routes linking Eastern Africa to Southern and South Eastern Asia (fig. 6).  
345 The interval of our timing estimate for the initial migration overlaps with the so-called Middle  
346 Asian Interaction sphere in The Age of Integration (2600-1900 BCE), which is marked by  
347 increased cultural exchange and trade between civilizations of Egypt, Mesopotamia, the Arabian  
348 peninsula, and the Indus Valley (Vogt 1996; Zarins 1996; Parkin and Barnes 2002; Ray 2003;  
349 Coningham and Young 2015). East-West contact and trade across the Indian Ocean intensified  
350 in the first millennium BCE, when maritime networks expanded to include the eastern  
351 Mediterranean, the Red Sea, and the Black Sea (Dilke 1985; Boussac et al. 1995; Ray et al.  
352 1996; Salles 1996). Historical data from the Roman era indicate that crews on trading ships  
353 crossing the Indian Ocean comprised fluid assemblages of individuals from diverse regions,  
354 brought together under conditions favorable for the transmission of TB (André and Filliozat  
355 1986; Begley and De Puma 1991; Wink 2002; Rauh 2003). These ships would have been an  
356 efficient means of spreading *M.tb* among the distant regions involved in trade.

357  
358 L2 may similarly have an origin in East-West maritime trade across the Indian Ocean, as we  
359 infer it arose from a migration event from Eastern Africa to South Eastern Asia during the 1<sup>st</sup>  
360 millennium BCE. In this era, increased sophistication in ship technology allowed for longer  
361 voyages (Kent 1979; Blench 1996; Ray et al. 1996; Parkin and Barnes 2002; Wink 2002; Ray  
362 2003). L2 appears to have spread out of Southeast Asia, a highly connected region in our  
363 analyses of *M.tb* migration, and is currently found across Eastern Eurasia and throughout South  
364 Eastern Asia (fig. 1, fig. 4, fig. S6, fig. S11). Interestingly, although L2 is dominant in Eastern  
365 Asia, the region did not appear to have played a prominent role in dispersal of this lineage,  
366 except in its exchanges with South Eastern Asia.

367  
368 In contrast to L1 and L2, L3 appears to have had relatively low rates of migration throughout its  
369 history (fig. 3). The contemporary geographic range of L3 is also narrower, extending east from  
370 Northern Africa through Western Asia to the Indian subcontinent (fig. 1). A study of lineage  
371 prevalence in Ethiopia showed that L3 is currently concentrated in the north of the country  
372 (Comas et al. 2015), consistent with our observed north to south gradient in its distribution on  
373 the African continent. This is in opposition to L1, which has a southern predominance in  
374 Ethiopia and across Eastern Africa (fig. 1). We estimate L3 emerged in Southern Asia ca. 520  
375 CE (177-739 CE). Pakistan harbors diverse strains belonging to L3 (fig. S9), and the Southern  
376 Asia region was highly connected with Eastern Africa in our analyses (fig. S11). Trade along

377 the Silk Road connecting Europe and Asia was very active in the middle of the first millennium,  
378 when we estimate L3 emerged (Hansen 2012; Ball 2016); its distribution suggests it spread  
379 primarily along trading routes connecting Northeast Africa, Western Asia, and South Asia  
380 (André and Filliozat 1986; Sartre 1991; Hansen 2012; Ball 2016) (fig. 6). We speculate that this  
381 occurred *via* overland routes, which may have limited the migration of L3 relative to maritime  
382 dispersal of the other lineages.

383  
384 The geographic distribution of L4 is strikingly broad (fig. 1) and it exhibits minimal population  
385 structure (table 1). This suggests L4 dispersed efficiently and continued to mix fluidly among  
386 regions, a pattern we would expect if it was carried by an exceptionally mobile population of  
387 hosts. L4 is currently concentrated in regions bordering the Mediterranean, and elsewhere  
388 throughout Africa and Europe (fig. 1). We estimate the MRCA of L4 emerged in the 1<sup>st</sup> century  
389 CE (range 368 BCE-362 CE), during the peak of Roman Imperial power across the entire  
390 Mediterranean world and expansionist Roman policies into Africa, Europe, and Mesopotamia  
391 (Luttwak 1976; Isaac 2004). The empire reached its greatest territorial extent in the early  
392 second century CE, when all of North Africa, from the Atlantic Ocean to the Red Sea, was under  
393 a single power, with trade on land and sea facilitated by networks of stone-paved roads and  
394 protected maritime routes (Luttwak 1976; Millar 1993; Ball 2016). Primary sources from Roman  
395 civilization attest to trade with China, purposeful expeditions for exploration, cartography, and  
396 trade in the Red Sea and Indian Ocean (Pfister and Bellinger 1945; Dilke 1985; Begley and De  
397 Puma 1991; Erdkamp 2002; Butcher 2003).

398  
399 We hypothesize that the broad distribution of L4 reflects rapid diffusion from the Mediterranean  
400 region along trade routes extending throughout Africa, the Middle East, and on to India, China,  
401 and South Eastern Asia. High rates of migration appear to have been maintained for this  
402 lineage over much of its evolutionary history (fig. 3); patterns of connectivity implicate Europe  
403 and Africa in its dispersal (fig. S11). The association of L4 with European migrants is well  
404 described, particularly migrants to the Americas (Gagneux et al. 2006; Pepperell et al. 2011).  
405 Here we note bacterial population growth preceded geographic range expansion in L4 ~ca. 15<sup>th</sup>  
406 century (fig. 3), which coincides with the onset of the ‘age of exploration’ (Alam and  
407 Subrahmanyam 2009) that would have provided numerous opportunities for spread of this  
408 lineage from Europeans to other populations. We also note the origin and concentration of this  
409 lineage on the African continent. Our sample of L4 isolates includes several deeply rooting

410 African isolates, and African isolates are interspersed throughout the phylogeny (fig. 4, fig. S6,  
411 fig. S8).

412

413 The migratory histories of L5, L6, and L7 are less complicated than those of lineages 1-4.  
414 Specifically, L5 and L6 are restricted to Western Africa and L7 is found only in Ethiopia (fig. 4,  
415 fig. S6). The reasons for the restricted distributions of these lineages are not immediately  
416 obvious: there is evidence in our analyses that other lineages migrated in and out of Western  
417 Africa, and Eastern Africa emerged as highly connected and central to the dispersal of *M.tb* (fig.  
418 5). A potential explanation is restriction of the pathogen population to human sub-populations  
419 with distinct patterns of mobility and connectivity that did not facilitate dispersal. This is likely  
420 the case for L7, which was discovered only recently (Blouin et al. 2012), and is currently largely  
421 restricted to the highlands of northern Ethiopia (Firdessa et al. 2013; Comas et al. 2015). In the  
422 case of L6 (also known as *Mycobacterium africanum*), there is evidence suggesting infection is  
423 less likely to progress to active disease than for *M. tuberculosis sensu stricto* (Jong et al. 2008),  
424 which could have played a role in limiting its dispersal.

425

426 Our reconstructions of *M.tb*'s migratory history suggest that patterns of migration were highly  
427 dynamic: the pathogen appears to have dispersed efficiently, in complex patterns that  
428 nonetheless preserved the distinct structure of each lineage. Some findings, notably inference  
429 of population expansion, were consistent across lineages. Though growth of the global *M.tb*  
430 population has been described previously (Comas et al. 2013; Pepperell et al. 2013), our results  
431 here suggest that the pace and magnitude of expansion, and its apparent relationship to trends  
432 in migration, varied among lineages (fig. 3, fig. S3, fig. S11).

433

434 Our analyses suggest that the expansion of L2 was preceded by an impressive increase in its  
435 rate of migration (fig. 3), implying that growth of the pathogen population was facilitated by  
436 expansion into new niches. Our phylogeographic reconstructions implicate Russia, Central  
437 Asia, and Western Asia in the recent migratory history of L2 (fig. S10, fig. S11), which is  
438 consistent with a published phylogeographic analysis of L2 (Luo et al. 2015). The inferred  
439 timing of the growth and increased migration of L2 (~ca. 13<sup>th</sup> century) is close to the well  
440 documented incursion of *Yersinia pestis* from Central Asia into Europe that resulted in explosive  
441 plague epidemics (Benedictow 2004). The experience with plague suggests that patterns of  
442 connectivity among humans and other disease vectors were shifting at this place and time,  
443 which would potentially open new niches for pathogens including *M.tb*.

444

445 We estimate that L1 underwent expansion ~ca. 17<sup>th</sup> century (fig. 3) but in this case it appears to  
446 have grown *in situ*, e.g. due to changing environmental conditions such as increased crowding,  
447 and/or growth of local human populations. A study of the molecular epidemiology of TB in  
448 Vietnam identified numerous recent migrations of L2 and L4 into the region, versus a stable  
449 presence of L1 (Holt et al. 2018); this is consistent with our finding of higher recent rates of  
450 migration for L2 and L4 versus L1 (fig. 3). A pattern similar to L1 has been identified previously,  
451 in the delay between dispersal of *M.tb* from European migrants to Canadian First Nations and  
452 later epidemics of TB driven by shifting disease ecology (Pepperell et al. 2011). These results  
453 demonstrate the complex relationship between *M.tb* population growth and migration, and show  
454 that under favorable conditions the pathogen can expand into novel niches or accommodate  
455 growth in an existing niche.

456

457 In a previous study, we used analyses of synonymous and non-synonymous SFS to delineate  
458 effects of purifying selection, linkage of sites, and population expansion on global populations of  
459 *M.tb* (Pepperell et al. 2013). Simulation studies have shown that purifying selection can affect  
460 demographic inference with BEAST and SFS-based methods (Ewing and Jensen 2015;  
461 Lapiere et al. 2016). Although our analyses here using *∂a∂i* were restricted to synonymous  
462 SFS, it is likely that inference of population size changes with this method and with BEAST were  
463 affected by purifying selection on this fully linked genome. The magnitude of inferred  
464 expansions may thus reflect both population size changes and background selection, and  
465 should not be interpreted as direct reflections of historical changes in census population size.  
466 We did not detect an effect of purifying selection on inference of migration in our three  
467 population simulation analyses (fig. S16, fig. S17), but differences in the strength of purifying  
468 selection could contribute to the lineage-specific differences we observed in the size of inferred  
469 population expansions: i.e., genome-wide patterns of purifying selection could differ among  
470 lineages. We previously found evidence suggesting that the fitness trade-offs of drug resistance  
471 mutations vary among lineages (Mortimer et al. 2018), making this intriguing possibility  
472 potentially feasible.

473

474 While this study comprises the largest phylogeographic analysis on *M.tb* done to date, with 552  
475 isolates collected from 51 countries and all seven described lineages represented, it has some  
476 important limitations. We did not attempt to estimate the rate or timescale of *M.tb* evolution,  
477 instead relying on published rates that were calibrated with ancient DNA. This is an active area

478 of research, and newly discovered ancient *M.tb* DNA samples will likely refine inference of both  
479 the timing and locations of historical migration events, though it is critical to note that recent  
480 substitution rate estimates of *M.tb* have converged on rates around  $5 \times 10^{-8}$  substitutions per site  
481 per year (Eldholm et al. 2016). Even when substitution rate estimates can be estimated with  
482 confidence, the precision with which individual events can be dated using genetic data should  
483 not be over-stated, as evidenced by broad 95% credible intervals for internal node date  
484 estimates (e.g., Eldholm et al. 2016). Our goal here was to reconstruct historical migration of  
485 *M.tb* throughout Eurasia and Africa and place this evolutionary history within a broad historical  
486 context; the historical phenomena that we connect with the spread of TB involved vast areas  
487 and extended over hundreds and in some cases thousands of years. Our reconstruction of the  
488 global dispersal of TB within a temporal framework provided by ancient *M.tb* DNA analysis links  
489 spread of the disease to the first ~1500y of the common era, a period of remarkable  
490 intensification in the connectedness among peoples of Africa, Asia and Europe (Green 2018).

491

#### 492 Methods

493 **Lineage Frequencies.** The SITVIT WEB database (Demay et al. 2012), which is an open  
494 access *M.tb* molecular markers database, was accessed on September 5, 2016. Spoligotypes  
495 were translated to lineages based on the following study (Shabbeer et al. 2012). The following  
496 conversions were also included: EAI7-BGD2 for L1, CAS for L3, and LAM7-TUR, LAM12-  
497 Madrid1, T5, T3-OSA, and H4 for L4. Isolates containing ambiguous spoligotypes (denoted with  
498 >1 spoligotype) were inspected manually and assigned to appropriate lineages. Relative  
499 lineage frequencies of lineages 1-6 for each country containing data for >10 isolates were  
500 calculated and plotted with the rworldmap package in R (South 2016).

501

#### 502 **Sample Description.**

503 *Old World collection.* We assembled/aligned publicly available whole genome sequences  
504 (WGS) of thousands of *M.tb* isolates from recently published studies and databases for which  
505 country of origin information were known and corresponded to traditional definitions of the Old  
506 World. Isolates were assembled via reference guided assembly (RGA) when FASTQ data were  
507 available and by multiple genome alignment (MGA) when only draft genome assemblies were  
508 accessible (see below). As we were interested in reconstructing historical migrations of the  
509 pathogen, we excluded countries where the majority of contemporary TB cases are identified in  
510 recent immigrants (Barry et al. 2012; CCDIC 2014; ESR 2015; CDC 2016; PHE 2016; White et  
511 al. 2017). Due to computational limitations (BEAST analyses), we necessarily took measures to

512 limit our dataset to <600 isolates. For countries with large numbers of available genomes, we  
513 implemented a sub-sampling strategy similar one previously described (Thorpe et al. 2017),  
514 whereby phylogenetic lineage diversity was captured thus minimizing the overrepresentation of  
515 clonal complexes (e.g., outbreaks): phylogenetic inference on all isolates available from a  
516 country was performed with Fasttree (Price et al. 2010) and a random isolate was selected from  
517 each clade extending from  $n$  branches, where  $n$  was the desired number of isolates from the  
518 country. Numbers of isolates per country were selected based on the availability of appropriate  
519 genome sequence data as well as relative TB prevalence (fig. S1) (WHO 2017). All isolates  
520 belonging to lineages 5-7 were retained. As a whole, this dataset reflects a ‘mixed’ sampling  
521 scheme (Lapierre et al. 2016), where lineages L5-L7 are overrepresented relative to their  
522 contemporary frequencies (fig. 1). At the lineage-specific scale, L1-L4 approximate random  
523 sampling of available genomes. Our final Old World collection consisted of the WGS of 552  
524 previously published *M.tb* isolates collected from 51 countries spanning 13 UN geoscheme  
525 subregions. Accession numbers and pertinent information about each sample can be found in  
526 table S1.

527

528 We note that our sample necessarily contains a large number of drug-resistant isolates as these  
529 are more commonly sequenced. We also acknowledge that the studies we draw genomes from  
530 may have been subject to other sampling biases for which we are unaware.

531

532 *Northern and Central American collection.* For one analysis, we included an additional 15  
533 isolates from a previous study (Comas et al. 2015) for which country of origin information were  
534 known and corresponded to the Americas. Isolates were assembled via RGA (see below) and  
535 their genotypes at the 3,838,249 bp considered for all analyses of the Old World collection were  
536 extracted.

537

538 **Reference Guided Assembly.** Previously published FASTQ data were retrieved from the  
539 National Center for Biotechnology Information (NCBI) sequence read archive (SRA) (Leinonen  
540 et al. 2011). Low-quality bases were trimmed using a threshold quality of 15, and reads  
541 resulting in less than 20bp length were discarded using Trim Galore!

542 ([http://www.bioinformatics.babraham.ac.uk/projects/trim\\_galore/](http://www.bioinformatics.babraham.ac.uk/projects/trim_galore/)), which is a wrapper tool

543 around Cutadapt (Martin 2011) and FastQC

544 (<http://www.bioinformatics.babraham.ac.uk/projects/fastqc/>). Reads were mapped to H37Rv

545 (NC\_000962.3) (Cole et al. 1998) with the MEM algorithm (Li 2013). Duplicates were removed



546 using Picard Tools (<http://picard.sourceforge.net>), and local realignment was performed with  
547 GATK (DePristo et al. 2011). To ensure only high quality sequencing data were included,  
548 individual sequencing runs for which <80% of the H37Rv genome was covered by at least 20X  
549 coverage were discarded, as were runs for which <70% of the reads mapped as determined by  
550 Qualimap (García-Alcalde et al. 2012). Pilon (Walker et al. 2014) was used to call variants with  
551 the following parameters: --variant --mindepth 10 --minmq 40 --minqual 20.

552

553 **Multiple Genome Alignment.** Draft genome assemblies were aligned to H37Rv  
554 (NC\_000962.3) (Cole et al. 1998) with Mugsy v1.2.3 (Angiuoli and Salzberg 2011). Regions not  
555 present in H37Rv were removed and merged with the reference-guided assembly.

556

557 **SNP alignment.** Variant calls (VCFs) were converted to FASTAs with in-house scripts that  
558 treat ambiguous calls and deletions as missing data (available at [https://github.com/pepperell-](https://github.com/pepperell-lab/RGAPepPipe)  
559 [lab/RGAPepPipe](https://github.com/pepperell-lab/RGAPepPipe)). Transposable elements, phage elements, and repetitive families of genes  
560 (PE, PPE, and PE-PGRS gene families) that are poorly resolved with short read sequencing  
561 were masked to missing data. Isolates with >20% missing sites were excluded from the Old  
562 World collection (table S1). Variant positions with respect to H37Rv were extracted with SNP-  
563 sites (Page et al. 2016) resulting in 60,818 variant sites. Only sites where at least half of the  
564 isolates had confident data (i.e., non-missing) were included in the phylogeographic models and  
565 population genetic analyses (60,787 variant sites; 3,838,249 bp). 1.7% of variant sites landed in  
566 loci associated with drug resistance (table S5).

567

568 **Geographic Information.** Geographic locations for each of the 552 samples in the Old World  
569 collection were obtained from NCBI and/or the respective publications from which the isolates  
570 were first described. When precise geographic information was available (e.g., city, province,  
571 etc.), coordinates were obtained from [www.mapcoordinates.net](http://www.mapcoordinates.net). When only country level  
572 geographic information was found, the 'Create Random Point' tool in ArcGIS 10.3 was used to  
573 randomly place each isolate without specific latitude and longitude inside its respective country;  
574 inhospitable areas (e.g., deserts and high mountains) and unpopulated areas from each country  
575 using 50m data from Natural Earth (<http://www.naturalearthdata.com/downloads>, accessed  
576 February 17, 2016) were excluded as possible coordinates. The 'precision' column of table S1  
577 reflects which method was used.

578

579 **Trade Route Information.** Data for all trade routes active throughout Europe, Africa, and Asia  
580 by 1400 CE were compiled from the Old World Trade Routes (OWTRAD) Project  
581 ([www.ciolek.com/owtrad.html](http://www.ciolek.com/owtrad.html), accessed February 17, 2016). For each route, both node  
582 information (trade cities, oases, and caravanserai) and arc information (the routes between  
583 nodes) were imported into ArcGIS (fig. 6). *M.tb* isolate locations were also imported as points  
584 and the 'Generate Near Table' tool was used to assign each isolate to its nearest node in the  
585 trade network and is listed in the 'NearPost' column of table S1.

586  
587 **Maximum Likelihood Inference.** We used RAxML v8.2.3 (Stamatakis 2014) for maximum  
588 likelihood phylogenetic analysis of the Old World collection (all sites where at least half of  
589 isolates had non-missing data) under the general time reversible model of nucleotide  
590 substitution with a gamma distribution to account for site-specific rate heterogeneity. Rapid  
591 bootstrapping of the corresponding SNP alignment was performed with the -autoMR flag,  
592 converging after 50 replicates. Tree visualization was created with the ggtree package in R (Yu  
593 et al. 2017).

594  
595 **Structure Analyses.** Unsupervised clustering analysis of Old World isolates was performed  
596 with STRUCTURE v2.3.4 (Pritchard et al. 2000). For *K* values between 2-12, ten replicate runs  
597 consisting of 10,000 burn-in iterations followed by 50,000 iterations were performed with default  
598 settings on a subset of the Old World SNP alignment (4053 SNPs occurring at a minor allele  
599 frequency > 0.01 with no missing data). StructureHarvester (Earl and vonHoldt 2012) was used  
600 to collate results and determine the most suitable value of *K* following the "Evanno" method  
601 (Evanno et al. 2005). Replicate runs with the lowest log likelihood for each value of *K* were  
602 used for visualization of results.

603  
604 **Phylogeographic & Demographic Inference with BEAST.** The Old World collection SNP  
605 alignment and individual lineage SNP alignments were analyzed using the Bayesian Markov  
606 Chain Monte Carlo coalescent method implemented in BEAST v1.8 (Drummond and Rambaut  
607 2007) with the BEAGLE library (Ayres et al. 2012) to facilitate rapid likelihood calculations.  
608 Analyses were performed using the general time reversible model of nucleotide substitution with  
609 a gamma distribution to account for rate heterogeneity between sites, a strict molecular clock,  
610 and both constant and Bayesian skyline plot (BSP) demographic models. Country of origin or  
611 the UN subregion for each isolate was modeled as a discrete phylogenetic trait (Lemey et al.  
612 2009). All Markov chains were run for at least 100 million generations, sampled every 10,000

613 generations, and with the first 10,000,000 generations discarded as burn-in; replicate runs were  
614 performed for analyses and combined to assess convergence. Estimated sample size (ESS)  
615 values of non-nuisance parameters were >200 for all analyses. Site and substitution model  
616 choice were based on previous analyses of *M.tb* global alignments as opposed to an exhaustive  
617 comparison of models which would require unreasonable computational resources. Strict vs  
618 relaxed molecular clocks did not result in altered trends of migration at the lineage level, and  
619 comparisons between analyses using strict and relaxed clocks show strong correlation between  
620 the estimated height of nodes (e.g.,  $R^2 > 0.97$ ; fig S18). Table S6 provides a summary of  
621 BEAST analyses presented and the results derived from them. Tree visualizations were  
622 created with FigTree (<http://tree.bio.edu.ac.uk/software/figtree/>) and the ggtree package in R  
623 (Yu et al. 2017).

624  
625 We note that phylogeographic inference methods are an active area of research and  
626 increasingly sophisticated models are continuously being developed [e.g. (Lemey et al. 2010;  
627 De Maio et al. 2015)]. We found alternative methods unsuitable and/or intractable for our large  
628 dataset. As methods improve, comparison of the results inferred herein to other  
629 phylogeographic models will be important to investigate the sensitivity of our results to the  
630 method of phylogeographic inference.

631  
632 **Demographic inference from the observed site frequency spectrum (SFS).** SNP-sites  
633 (Page et al. 2016) was used to convert the Old World collection alignment to a multi-sample  
634 VCF and SnpEff (Cingolani et al. 2012) was used to annotate variants with respect to H37Rv  
635 (NC\_000962.3) (Cole et al. 1998) as synonymous, non-synonymous, or intergenic. Loci at  
636 which any sequence in the population had a gap or unknown character were removed from the  
637 data set. Demographic inference with the synonymous SFS for each of the seven lineages and  
638 the entire collection was performed using *∂a∂i* (Gutenkunst et al. 2009). We modeled constant  
639 population size (standard neutral model), an instantaneous expansion model, and an  
640 exponential growth model, and identified the best-fit model and maximal likelihood parameters  
641 of the demographic model given our observed data. Our parameter estimates,  $\nu$  and  $\tau$ , were  
642 optimized for the instantaneous expansion and exponential growth models. Uncertainty  
643 analysis of these parameters were analyzed using the Godambe Information Matrix (Coffman et  
644 al. 2016) on 100 samplings of the observed synonymous SFS with replacement and subsequent  
645 model inference.

646

647 **Population genetic statistics.** Nucleotide diversity ( $\pi$ ) and Watterson's theta ( $\theta$ ) for various  
648 population assignments (e.g., lineage, UN subregion) were calculated with EggLib v2.1.10 (De  
649 Mita and Siol 2012).

650

651 **Analysis of Molecular Variance (AMOVA).** AMOVAs were performed using the 'poppr.amova'  
652 function (a wrapper for the ade4 package (Dray et al. 2007) implementation) in the poppr  
653 package in R (Kamvar et al. 2014). Bins were assigned via the following classification systems:  
654 UN geoscheme subregions and Level 1 ('botanical continents') of the World geographical  
655 scheme for recording plant distributions. Isolate assignment can be found in table S1. Genetic  
656 distances between isolates were calculated with the 'dist.dna' function of the ape v4.0 package  
657 in R (Paradis et al. 2004) from the SNP alignment of the Old World collection.

658

659 **Mantel tests.** Great circle distances between *M.tb* isolate locations were calculated with the  
660 'distVincentyEllipsoid' function in the geosphere R package (Hijmans et al. 2016). Geographic  
661 distances between isolate locations along the trade network were calculated by adding the great  
662 circle distances from the isolates to the nearest trade hubs and the shortest distance between  
663 trade hubs along the trade network; the latter was determined using an Origin-Destination Cost  
664 Matrix and the 'Solve' tool in the Network Analyst Toolbox of ArcGIS which calculates the  
665 shortest distance from each origin to every destination along the arcs in the trade network. In  
666 the event that two isolates were assigned to the same trade post, the great circle distance  
667 between the isolates was used. To calculate the geographic distance between isolates in a  
668 manner that reflects human migrations, the great circle distance between isolates and  
669 waypoints were summed. These were calculated with a custom R function (available at  
670 [https://github.com/ONeillMB1/Mtb\\_Phylogeography\\_v2](https://github.com/ONeillMB1/Mtb_Phylogeography_v2)) using a series of rules to define  
671 whether or not the path between isolates would have gone through a waypoint. For all three  
672 distance metrics, values were log transformed and standardized. Genetic distances between  
673 isolates were calculated with the 'dist.dna' function in the ape v4.0 package in R (Paradis et al.  
674 2004) from the SNP alignment. The 'mantel' function of the vegan package in R (Oksanen et al.  
675 2017) was used to perform a Mantel test between the genetic distance matrix and each of the  
676 three geographic matrices for both the Old World collection and each individual lineage. Four of  
677 the 552 isolates were excluded from these analyses as they were from Kiribati and trade  
678 networks spanning this region were not compiled.

679

680 **Relationship between genetic diversity and geographic distance from Addis Ababa.** For  
681 this analysis, we added Northern and Central American datasets, assembled in an identical  
682 manner to those of the Old World collection and masked at sites where less than half of the Old  
683 World collection had confident data (3,838,249 bp). For each UN subregion, the mean latitude  
684 and longitude coordinates for all *M.tb* isolates within the region were calculated. The great  
685 circle distances from these average estimates for regions to Addis Ababa were then calculated,  
686 using waypoints for between-continent distance estimates to make them more reflective of  
687 presumed human migration patterns (Ramachandran et al. 2005). Cairo was used as a  
688 waypoint for Eastern Europe, Central Asia, Western Asia, Southern Asia, Eastern Asia, and  
689 South Eastern Asia; Cairo and Istanbul were used as waypoints for Western Europe and  
690 Southern Europe; Cairo, Anadyr, and Prince Rupert were used as waypoints for Northern and  
691 Central America. The distance between each region and Addis Ababa were the sum of the  
692 great circle distances between the two points (the average coordinates for the UN subregion  
693 and Addis Ababa) and the waypoint(s) in the path connecting them, plus the great circle  
694 distance(s) between waypoints if two were used. Treating each UN subregion as a population,  
695 the relationship between genetic diversity (assessed with  $\pi$ ) and geographic distance from  
696 Addis Ababa were explored with linear regression for both the entire Old World collection and  
697 individual lineages in R (R Development Core Team). Code is available at  
698 [https://github.com/ONEillMB1/Mtb\\_Phylogeography\\_v2](https://github.com/ONEillMB1/Mtb_Phylogeography_v2).

699  
700 **Migration Rate Inference.** Migration rates through time were inferred from the Bayesian  
701 maximum clade credibility trees for the entire Old World collection of *M.tb* isolates ( $n = 552$ ).  
702 Individual lineages that contain isolates from multiple UN subregions (i.e., L1:  $n = 89$ , L2:  $n =$   
703  $181$ , L3:  $n = 65$ , and L4:  $n = 143$ ) were extracted and plotted separately. Only nodes with  
704 posterior probabilities greater than or equal to 80% were considered. A migration event was  
705 classified as a change in the most probable reconstructed ancestral geographic region from a  
706 parent to child node. Median heights of the parent and child nodes were treated as a range of  
707 time that the migration event could have occurred. The rate of migration through time for each  
708 lineage or the Old World collection was inferred by summing the number of migration events  
709 occurring across every year of the time-scaled phylogeny, divided by the total number of  
710 branches in existence during each year of the time-scaled phylogeny (both those displaying a  
711 migration event and those that do not). Code for these analyses is available at  
712 [https://github.com/ONEillMB1/Mtb\\_Phylogeography\\_v2](https://github.com/ONEillMB1/Mtb_Phylogeography_v2).

713

714 Additionally, relative migration rates between UN subregions were derived from the BEAST  
715 analyses of phylogeography. The Bayesian stochastic search variable selection method  
716 (BSSVS) for identifying the most parsimonious migration matrix implemented in BEAST as part  
717 of the discrete phylogeographic migration model (Lemey et al. 2009) allowed us to use Bayes  
718 factors (BF) to identify the migration rates with the greatest posterior support and provide  
719 posterior estimates for their relative rates. Strongly supported relative rates ( $BF > 5$ ) and  
720 connectivity among subregions were visualized with Cytoscape v3.2.0 (Shannon et al. 2003)  
721 and superimposed onto a map generated with the 'rworldmap' package in R (South 2016). To  
722 assess the effect of sampling on migration rate inference, UN regions harboring greater than 10  
723 and 20 isolates were randomly subsampled to even numbers and subject to the same analysis.  
724 This was done 10 times each for  $n = 10$  and  $n = 20$ .

725  
726 **Effect of selection on estimates of migration.** We performed demographic forward-in-time  
727 simulations using the SFS\_CODE package (Hernandez 2008), which allows for demographic  
728 models with arbitrarily complex migration and selection regimes. Our simulations were  
729 performed under a simple two population model or with a more complex three population model.  
730 In all simulations,  $N_e$  for each population was 1000,  $\theta$  was 0.001 (O'Neill et al. 2015), and  
731 migration between each pair of populations was symmetrical. As there is substantial evidence  
732 for little to no recombination in the *M.tb* genome, our simulations were performed without  
733 recombination.

734  
735 The two population simulations were performed under three scenarios: 1) no migration between  
736 populations after initial divergence; 2) constant migration after divergence (per generation  $M =$   
737 0.5) without selection; and 3) constant migration ( $M = 0.5$ ) with purifying selection (25% of  
738 alleles of each population have a population selection coefficient of -1.0, and the rest are  
739 neutral) after divergence.

740  
741 The three population simulations were performed under five scenarios: 1) no migration between  
742 populations after simultaneous divergence of the three populations; 2) constant, symmetrical  
743 migration after divergence (per generation  $M = 0.5$  for all population pairs) without selection; 3)  
744 constant, symmetrical migration ( $M = 0.5$ ) with purifying selection (25% of alleles in all  
745 populations have a population selection coefficient of -1.0, and the rest are neutral); 4) constant,  
746 asymmetrical migration after divergence ( $M = 0.5$  for migration between pop0 and pop1,  $M = 5.0$   
747 for migration between pop1 and pop2, and  $M = 0$  for migration between pop0 and pop2) without

748 selection; and 5) constant, asymmetrical migration after divergence ( $M = 0.5$  between pop0 and  
749 pop1,  $M = 5.0$  between pop1 and pop2, and  $M = 0$  between pop0 and pop2) with purifying  
750 selection (25% of alleles in all populations have a population selection coefficient of  $-1.0$ , and  
751 the rest are neutral).

752  
753 For all simulations, 25 samples were taken from each population, and sequences of 100000  
754 bases were generated. Twenty simulations were performed under each scenario for both the 2  
755 population (60 simulations) and 3 population (100 simulations) models. Each sequence  
756 alignment was subsequently subjected to migration analysis in *∂a∂i* (Gutenkunst et al. 2009, see  
757 Note S2) and BEAST v1.8.4 (Drummond and Rambaut 2007). For each Bayesian coalescent  
758 analysis, the HKY+G substitution model, a constant population model, and a strict molecular  
759 clock model were used. A discrete symmetrical migration model (Lemey et al. 2009) was used  
760 to determine migration rates, and BSSVS (Lemey et al. 2009) was used to estimate BF support  
761 for migration rates in the 3 population simulations. All Markov chains were run for 10 million  
762 generations or until convergence, with samples taken every 10,000 steps, and 10% discarded  
763 as burn-in. The package Spread3 v0.96 (Bielejec et al. 2016) was used to calculate BF support  
764 for migration rates.

765

#### 766 Acknowledgments

767 We would like to thank past and present members of the Pepperell Lab for helpful feedback on  
768 the project, and particularly highlight Trent Prall for his contribution to preliminary research on  
769 historic human trade routes. We also wish to thank Lucy Weinert for her advice on Mantel test  
770 standardization. MBO is supported by the National Science Foundation Graduate Research  
771 Fellowship Program (DGE-1255259). CSP is supported by National Institutes of Health  
772 (R01AI113287).

773 **References**

- 774 Alam M, Subrahmanyam S. 2009. Indo-Persian travels in the age of discoveries, 1400-1800.  
775 Digit. pr. Cambridge: Cambridge University Press.
- 776 André J, Filiozat J. 1986. L'Inde vue de Rome: textes latins de l'antiquité, relatifs à l'Inde.  
777 Paris: Belles Lettres.
- 778 Angiuoli SV, Salzberg SL. 2011. Mugsy: fast multiple alignment of closely related whole  
779 genomes. *Bioinformatics* 27:334–342.
- 780 Ayres DL, Darling A, Zwickl DJ, Beerli P, Holder MT, Lewis PO, Huelsenbeck JP, Ronquist F,  
781 Swofford DL, Cummings MP, et al. 2012. BEAGLE: An Application Programming  
782 Interface and High-Performance Computing Library for Statistical Phylogenetics. *Syst.*  
783 *Biol.* 61:170–173.
- 784 Ball W. 2016. Rome in the East: The Transformation of an Empire. 2nd ed. London & New  
785 York: Routledge.
- 786 Barry C, Waring J, Stapledon R, Konstantinos A. 2012. Tuberculosis notifications in Australia,  
787 2008 and 2009. *Communicable Diseases Intelligence* 36:86-94.
- 788 Begley V, De Puma RD. 1991. Rome and India: The Ancient Sea Trade. Madison: University of  
789 Wisconsin Press.
- 790 Behr MA, Wilson MA, Gill WP, Salamon H, Schoolnik GK, Rane S, Small PM. 1999.  
791 Comparative genomics of BCG vaccines by whole-genome DNA microarray. *Science*  
792 284:1520–1523.
- 793 Benedictow OJ. 2004. The Black Death, 1346-1353: the complete history. Woodbridge, Suffolk,  
794 UK; Rochester, N.Y., USA: Boydell Press.
- 795 Bielejec F, Baele G, Rodrigo AG, Suchard MA, Lemey P. 2016. Identifying predictors of time-  
796 inhomogeneous viral evolutionary processes. *Virus Evol.* 2:vew023.
- 797 Blench R. 1996. The Ethnographic Evidence for Long-distance Contacts between Oceania and  
798 East Africa. In: Reade J, editor. *The Indian Ocean in antiquity*.
- 799 Blouin Y, Hauck Y, Soler C, Fabre M, Vong R, Dehan C, Cazajous G, Massoure P-L, Kraemer  
800 P, Jenkins A, et al. 2012. Significance of the Identification in the Horn of Africa of an  
801 Exceptionally Deep Branching Mycobacterium tuberculosis Clade. *PLOS ONE*  
802 7:e52841.
- 803 Bos KI, Harkins KM, Herbig A, Coscolla M, Weber N, Comas I, Forrest SA, Bryant JM, Harris  
804 SR, Schuenemann VJ, et al. 2014. Pre-Columbian mycobacterial genomes reveal seals as  
805 a source of New World human tuberculosis. *Nature* 514:494–497.



- 806 Boussac M-F, Salles J-F, France eds. 1995. Athens, Aden, Arikamedu: essays on the  
807 interrelations between India, Arabia, and the eastern Mediterranean. New Delhi:  
808 Manohar: Distributed in South Asia by Foundation Books.
- 809 Brosch R, Gordon SV, Marmiesse M, Brodin P, Buchrieser C, Eiglmeier K, Garnier T, Gutierrez  
810 C, Hewinson G, Kremer K, et al. 2002. A new evolutionary scenario for the  
811 Mycobacterium tuberculosis complex. Proc. Natl. Acad. Sci. 99:3684–3689.
- 812 Butcher K. 2003. Roman Syria and the Near East. Los Angeles: J. Paul Getty Museum: Getty  
813 Publications.
- 814 Centers for Disease Control and Prevention (CDC). 2016. Reported Tuberculosis in the United  
815 States, 2015. Atlanta, GA: US Department of Health and Human Services.
- 816 Centre for Communicable Diseases and Infection Control (CCDIC). 2014. Tuberculosis  
817 prevention and control in Canada a federal framework for action. Public Health Agency  
818 of Canada.
- 819 Cingolani P, Platts A, Wang LL, Coon M, Nguyen T, Wang L, Land SJ, Lu X, Ruden DM. 2012.  
820 A program for annotating and predicting the effects of single nucleotide polymorphisms,  
821 SnpEff. Fly (Austin) 6:80–92.
- 822 Coffman AJ, Hsieh PH, Gravel S, Gutenkunst RN. 2016. Computationally Efficient Composite  
823 Likelihood Statistics for Demographic Inference. Mol. Biol. Evol. 33:591–593.
- 824 Cole ST, Brosch R, Parkhill J, Garnier T, Churcher C, Harris D, Gordon SV, Eiglmeier K, Gas S,  
825 III CEBI, et al. 1998. Erratum: Deciphering the biology of Mycobacterium tuberculosis  
826 from the complete genome sequence. Nat. Lond. 396:190.
- 827 Comas I, Coscolla M, Luo T, Borrell S, Holt KE, Kato-Maeda M, Parkhill J, Malla B, Berg S,  
828 Thwaites G, et al. 2013. Out-of-Africa migration and Neolithic coexpansion of  
829 Mycobacterium tuberculosis with modern humans. Nat. Genet. 45:1176–1182.
- 830 Comas I, Hailu E, Kiros T, Bekele S, Mekonnen W, Gumi B, Tschopp R, Ameni G, Hewinson  
831 RG, Robertson BD, et al. 2015. Population Genomics of Mycobacterium tuberculosis in  
832 Ethiopia Contradicts the Virgin Soil Hypothesis for Human Tuberculosis in Sub-Saharan  
833 Africa. Curr. Biol. 25:3260–3266.
- 834 Coningham R, Young R. 2015. The Archaeology of South Asia: From the Indus to Asoka,  
835 c.6500 BCE–200 CE. Cambridge University Press.
- 836 De Maio N, Wu C-H, O'Reilly KM, Wilson D. 2015. New Routes to Phylogeography: A  
837 Bayesian Structured Coalescent Approximation. PLoS Genet 11:e1005421.
- 838 De Mita S, Siol M. 2012. EggLib: processing, analysis and simulation tools for population  
839 genetics and genomics. BMC Genet. 13:27.

- 840 Demay C, Liens B, Burguière T, Hill V, Couvin D, Millet J, Mokrousov I, Sola C, Zozio T,  
841 Rastogi N. 2012. SITVITWEB – A publicly available international multimer database  
842 for studying Mycobacterium tuberculosis genetic diversity and molecular epidemiology.  
843 Infect. Genet. Evol. 12:755–766.
- 844 DePristo MA, Banks E, Poplin R, Garimella KV, Maguire JR, Hartl C, Philippakis AA, del  
845 Angel G, Rivas MA, Hanna M, et al. 2011. A framework for variation discovery and  
846 genotyping using next-generation DNA sequencing data. Nat. Genet. 43:491–498.
- 847 Dilke O. 1985. Greek and Roman Maps. Baltimore: Johns Hopkins University Press
- 848 Dray S, Dufour A-B, others. 2007. The ade4 package: implementing the duality diagram for  
849 ecologists. J. Stat. Softw. 22:1–20.
- 850 Drummond AJ, Rambaut A. 2007. BEAST: Bayesian evolutionary analysis by sampling trees.  
851 BMC Evol. Biol. 7:214.
- 852 Duchêne S, Holt KE, Weill F-X, Le Hello S, Hawkey J, Edwards DJ, Fourment M, Holmes EC.  
853 2016. Genome-scale rates of evolutionary change in bacteria. Microb. Genomics 2:  
854 e000094.
- 855 Earl DA, vonHoldt BM. 2012. STRUCTURE HARVESTER: a website and program for  
856 visualizing STRUCTURE output and implementing the Evanno method. Conserv. Genet.  
857 Resour. 4:359–361.
- 858 Eldholm V, Balloux F. 2016. Antimicrobial Resistance in Mycobacterium tuberculosis: The Odd  
859 One Out. Trends Microbiol. 24:637–648.
- 860 Eldholm V, Pettersson JH-O, Brynildsrud OB, Kitchen A, Rasmussen EM, Lillebaek T, Rønning  
861 JO, Crudu V, Mengshoel AT, Debech N, et al. 2016. Armed conflict and population  
862 displacement as drivers of the evolution and dispersal of Mycobacterium tuberculosis.  
863 Proc. Natl. Acad. Sci. 113:13881–13886.
- 864 Erdkamp P. 2002. The Roman Army and the Economy. Amsterdam: Gieben.
- 865 Evanno G, Regnaut S, Goudet J. 2005. Detecting the number of clusters of individuals using the  
866 software structure: a simulation study. Mol. Ecol. 14:2611–2620.
- 867 Ewing GB, Jensen JD. 2015. The consequences of not accounting for background selection in  
868 demographic inference. Mol. Ecol. 25:135–141.
- 869 Firdessa R, Berg S, Hailu E, Schelling E, Gumi B, Erenso G, Gadisa E, Kiros T, Habtamu M,  
870 Hussein J, et al. 2013. Mycobacterial lineages causing pulmonary and extrapulmonary  
871 tuberculosis, Ethiopia. Emerg. Infect. Dis. 19:460–463.
- 872 Gagneux S, DeRiemer K, Van T, Kato-Maeda M, de Jong BC, Narayanan S, Nicol M, Niemann  
873 S, Kremer K, Gutierrez MC, et al. 2006. Variable host–pathogen compatibility in  
874 Mycobacterium tuberculosis. Proc. Natl. Acad. Sci. U. S. A. 103:2869–2873.

- 875 García-Alcalde F, Okonechnikov K, Carbonell J, Cruz LM, Götz S, Tarazona S, Dopazo J,  
876 Meyer TF, Conesa A. 2012. Qualimap: evaluating next-generation sequencing alignment  
877 data. *Bioinformatics* 28:2678–2679.
- 878 Green MH. 2018. *Climate and Disease in Medieval Eurasia*. *Oxf. Res. Encycl. Asian Hist.*
- 879 Gutenkunst RN, Hernandez RD, Williamson SH, Bustamante CD. 2009. Inferring the Joint  
880 Demographic History of Multiple Populations from Multidimensional SNP Frequency  
881 Data. *PLoS Genet* 5:e1000695.
- 882 Hansen V. 2012. *The Silk Road: A New History*. Oxford: Oxford University Press.
- 883 Hernandez RD. 2008. A flexible forward simulator for populations subject to selection and  
884 demography. *Bioinformatics* 24:2786–2787.
- 885 Hershberg R, Lipatov M, Small PM, Sheffer H, Niemann S, Homolka S, Roach JC, Kremer K,  
886 Petrov DA, Feldman MW, et al. 2008. High functional diversity in *Mycobacterium*  
887 tuberculosis driven by genetic drift and human demography. *PLoS Biol.* 6:e311.
- 888 Hijmans RJ, Williams E, Vennes C. 2016. *geosphere: Spherical Trigonometry*. Available from:  
889 <https://cran.r-project.org/web/packages/geosphere/index.html>
- 890 Hirsh AE, Tsolaki AG, DeRiemer K, Feldman MW, Small PM. 2004. Stable association between  
891 strains of *Mycobacterium tuberculosis* and their human host populations. *Proc Natl Acad*  
892 *Sci U A* 101:4871–4876.
- 893 Holt KE, McAdam P, Thai PVK, Thuong NTT, Ha DTM, Lan NN, Lan NH, Nhu NTQ, Hai HT,  
894 Ha VTN, et al. 2018. Frequent transmission of the *Mycobacterium tuberculosis* Beijing  
895 lineage and positive selection for the EsxW Beijing variant in Vietnam. *Nat. Genet.*  
896 50:849–856.
- 897 Institute of Environmental Science and Research Ltd (ESR). 2015. *Tuberculosis in New Zealand:*  
898 *Annual Report 2014*. Porirua: ESR.
- 899 Isaac BH. 2004. *The limits of empire: the Roman army in the East*. Oxford: Clarendon Press.
- 900 Jong D, C B, Hill PC, Aiken A, Awine T, Martin A, Adetifa IM, Jackson-Sillah DJ, Fox A,  
901 Kathryn D, et al. 2008. Progression to Active Tuberculosis, but Not Transmission, Varies  
902 by *Mycobacterium tuberculosis* Lineage in The Gambia. *J. Infect. Dis.* 198:1037–1043.
- 903 Kamvar ZN, Tabima JF, Grünwald NJ. 2014. Poppr: an R package for genetic analysis of  
904 populations with clonal, partially clonal, and/or sexual reproduction. *PeerJ* 2:e281.
- 905 Kay GL, Sergeant MJ, Zhou Z, Chan JZ-M, Millard A, Quick J, Szikossy I, Pap I, Spigelman M,  
906 Loman NJ, et al. 2015. Eighteenth-century genomes show that mixed infections were  
907 common at time of peak tuberculosis in Europe. *Nat. Commun.* 6:6717.

- 908 Kent RK. 1979. The Possibilities of Indonesian Colonies in Africa with Reference to  
909 Madagascar. In: *Mouvements de Populations dans L'Océan Indienne*. Paris: H. Champion. p.  
910 93–105.
- 911 Lapiere M, Blin C, Lambert A, Achaz G, Rocha EPC. 2016. The Impact of Selection, Gene  
912 Conversion, and Biased Sampling on the Assessment of Microbial Demography. *Mol.*  
913 *Biol. Evol.* 33:1711–1725.
- 914 Leinonen R, Sugawara H, Shumway M. 2011. The Sequence Read Archive. *Nucleic Acids Res.*  
915 39:D19–D21.
- 916 Lemey P, Rambaut A, Drummond AJ, Suchard MA. 2009. Bayesian Phylogeography Finds Its  
917 Roots. *PLOS Comput. Biol.* 5:e1000520.
- 918 Lemey P, Rambaut A, Welch JJ, Suchard MA. 2010. Phylogeography Takes a Relaxed Random  
919 Walk in Continuous Space and Time. *Mol. Biol. Evol.* 27:1877–1885.
- 920 Li H. 2013. Aligning sequence reads, clone sequences and assembly contigs with BWA-MEM.  
921 ArXiv13033997 Q-Bio. Available from: <http://arxiv.org/abs/1303.3997>
- 922 Luo T, Comas I, Luo D, Lu B, Wu J, Wei L, Yang C, Liu Q, Gan M, Sun G, et al. 2015.  
923 Southern East Asian origin and coexpansion of *Mycobacterium tuberculosis* Beijing  
924 family with Han Chinese. *Proc. Natl. Acad. Sci.* 112:8136–8141.
- 925 Luttwak EN. 1976. *The grand strategy of the Roman Empire: from the first century A.D. to the*  
926 *third*. London: Weidenfeld & Nicholson.
- 927 Martin M. 2011. Cutadapt removes adapter sequences from high-throughput sequencing reads.  
928 *EMBnet.journal* 17:10–12.
- 929 Millar F. 1993. *The Roman Near East, 31 B.C.-A.D. 337*. Cambridge, Mass: Harvard University  
930 Press.
- 931 Mortimer TD, Weber AM, Pepperell CS. 2018. Signatures of Selection at Drug Resistance Loci  
932 in *Mycobacterium tuberculosis*. *mSystems* 3:e00108-17.
- 933 Oksanen J, Blanchet FG, Friendly M, Kindt R, Legendre P, McGlenn D, Minchin PR, O'Hara  
934 RB, Simpson GL, Solymos P, et al. 2017. *vegan: Community Ecology Package*.  
935 Available from: <https://cran.r-project.org/web/packages/vegan/index.html>
- 936 O'Neill MB, Mortimer TD, Pepperell CS. 2015. Diversity of *Mycobacterium tuberculosis* across  
937 Evolutionary Scales. *PLOS Pathog.* 11:e1005257.
- 938 Page AJ, Taylor B, Delaney AJ, Soares J, Seemann T, Keane JA, Harris SR. 2016. SNP-sites:  
939 rapid efficient extraction of SNPs from multi-FASTA alignments. *Microbial Genetics* 2 .
- 940 Paradis E, Claude J, Strimmer K. 2004. APE: Analyses of Phylogenetics and Evolution in R  
941 language. *Bioinformatics* 20:289–290.

- 942 Parkin D, Barnes R eds. 2002. Ships and the development of maritime technology in the Indian  
943 Ocean. London: RoutledgeCurzon.
- 944 Pepperell CS, Casto AM, Kitchen A, Granka JM, Cornejo OE, Holmes EC, Birren B, Galagan J,  
945 Feldman MW. 2013. The Role of Selection in Shaping Diversity of Natural M.  
946 tuberculosis Populations. PLoS Pathog 9:e1003543.
- 947 Pepperell CS, Granka JM, Alexander DC, Behr MA, Chui L, Gordon J, Guthrie JL, Jamieson  
948 FB, Langlois-Klassen D, Long R, et al. 2011. Dispersal of Mycobacterium tuberculosis  
949 via the Canadian fur trade. Proc. Natl. Acad. Sci. 108:6526–6531.
- 950 Pfister R, Bellinger L. 1945. The Excavations at Dura-Europos. Final Report IV: The Textiles.  
951 New Haven: Yale University Press.
- 952 Price MN, Dehal PS, Arkin AP. 2010. FastTree 2 – Approximately Maximum-Likelihood Trees  
953 for Large Alignments. PLOS ONE 5:e9490.
- 954 Pritchard JK, Stephens M, Donnelly P. 2000. Inference of Population Structure Using Multilocus  
955 Genotype Data. Genetics 155:945–959.
- 956 Public Health England (PHE). 2016. Tuberculosis in England: 2016. London, UK: PHE.
- 957 R Development Core Team. R: A Language and Environment for Statistical Computing. Vienna,  
958 Austria: R Foundation for Statistical Computing Available from: [http://www.R-](http://www.R-project.org/)  
959 [project.org/](http://www.R-project.org/)
- 960 Ramachandran S, Deshpande O, Roseman CC, Rosenberg NA, Feldman MW, Cavalli-Sforza  
961 LL. 2005. Support from the relationship of genetic and geographic distance in human  
962 populations for a serial founder effect originating in Africa. Proc. Natl. Acad. Sci. U. S.  
963 A. 102:15942–15947.
- 964 Rauh NK. 2003. Merchants, sailors and pirates in the Roman world. Stroud: Tempus.
- 965 Ray HP. 2003. The archaeology of seafaring in ancient South Asia. Cambridge; New York:  
966 Cambridge University Press.
- 967 Ray HP, Salles J-F, Institute of Southeast Asian Studies, Maison de l’Orient méditerranéen  
968 ancien (Lyon F, National Institute of Science, Technology and Development Studies,  
969 France, Ambassade (India), Centre for Human Sciences. 1996. Tradition and  
970 archaeology: early maritime contacts in the Indian Ocean. New Delhi: Manohar  
971 Publishers.
- 972 Rocha EPC, Smith JM, Hurst LD, Holden MTG, Cooper JE, Smith NH, Feil EJ. 2006.  
973 Comparisons of dN/dS are time dependent for closely related bacterial genomes. J.  
974 Theor. Biol. 239:226–235.
- 975 Salles J-F. 1996. Achaemenid and Hellenistic Trade in the Indian Ocean. In: The Indian Ocean in  
976 antiquity. p. 251–267.

- 977 Sartre M. 1991. L'Orient romain: provinces et sociétés provinciales en Méditerranée orientale  
978 d'Auguste aux Sévères (31 avant J.-C-235 après J.-C.). Paris: Seuil.
- 979 Shabbeer A, Cowan LS, Ozcaglar C, Rastogi N, Vandenberg SL, Yener B, Bennett KP. 2012.  
980 TB-Lineage: An online tool for classification and analysis of strains of Mycobacterium  
981 tuberculosis complex. *Infect. Genet. Evol.* 12:789–797.
- 982 Shannon P, Markiel A, Ozier O, Baliga NS, Wang JT, Ramage D, Amin N, Schwikowski B,  
983 Ideker T. 2003. Cytoscape: A Software Environment for Integrated Models of  
984 Biomolecular Interaction Networks. *Genome Res.* 13:2498–2504.
- 985 South A. 2016. rworldmap: Mapping Global Data. Available from: [https://cran.r-](https://cran.r-project.org/web/packages/rworldmap/index.html)  
986 [project.org/web/packages/rworldmap/index.html](https://cran.r-project.org/web/packages/rworldmap/index.html)
- 987 Stamatakis A. 2014. RAxML version 8: a tool for phylogenetic analysis and post-analysis of  
988 large phylogenies. *Bioinformatics* 30:1312–1313.
- 989 Thorpe HA, Bayliss SC, Hurst LD, Feil EJ. 2017. Comparative Analyses of Selection Operating  
990 on Nontranslated Intergenic Regions of Diverse Bacterial Species. *Genetics* 206:363–  
991 376.
- 992 Vogt B. 1996. Bronze Age Maritime Trade in the Indian Ocean: Harappan Traits on the Oman  
993 Peninsula. In: Reade J, editor. *The Indian Ocean in antiquity.* p. 107–132.
- 994 Walker BJ, Abeel T, Shea T, Priest M, Abouelliel A, Sakthikumar S, Cuomo CA, Zeng Q,  
995 Wortman J, Young SK, et al. 2014. Pilon: An Integrated Tool for Comprehensive  
996 Microbial Variant Detection and Genome Assembly Improvement. *PLOS ONE*  
997 9:e112963.
- 998 White Z, Painter J, Douglas P, Abubakar I, Njoo H, Archibald C, Halverson J, Robson J, Posey  
999 DL. 2017. Immigrant Arrival and Tuberculosis among Large Immigrant- and Refugee-  
1000 Receiving Countries, 2005-2009. *Tuberc. Res. Treat* 2017.
- 1001 Wink A. 2002. From the Mediterranean to the Indian Ocean: Medieval History in Geographic  
1002 Perspective. *Comp. Stud. Soc. Hist.* 44:416–445.
- 1003 World Health Organization (WHO). 2017. *Global tuberculosis report 2017.* Geneva: WHO.
- 1004 Yu G, Smith DK, Zhu H, Guan Y, Lam TT-Y. 2017. ggtree: an r package for visualization and  
1005 annotation of phylogenetic trees with their covariates and other associated data. *Methods*  
1006 *Ecol. Evol.* 8:28–36.
- 1007 Zarins J. 1996. Obsidian in the Larger Context of Predynastic/Archaic Egyptian Red Sea Trade.  
1008 In: Reade J, editor. *The Indian Ocean in antiquity.* p. 107–132.

1009 Figures and Tables  
1010

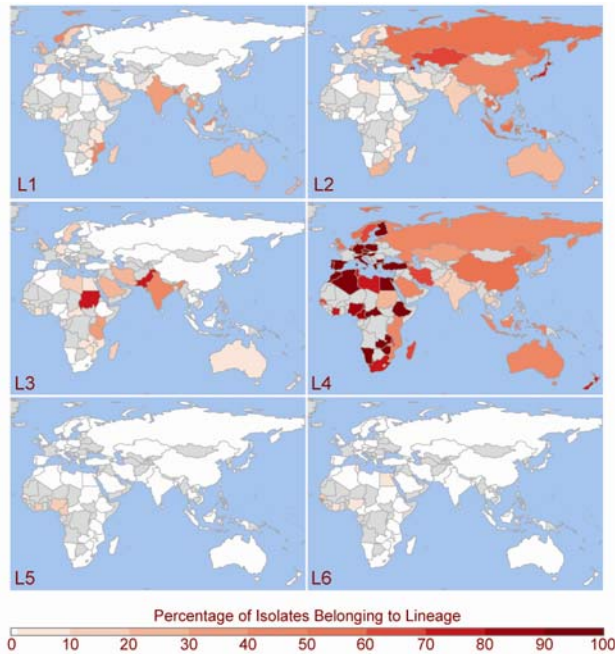

1011 **Fig. 1.** Geographic distributions of *Mycobacterium tuberculosis* lineages 1-6. Spoligotypes from  
1012 the SITVIT WEB database ( $n = 42,358$ ) were assigned to lineages 1-6. Countries are colored  
1013 from white to dark-red based on the percentage of isolates from the country belonging to each  
1014 lineage. Unsampled countries and those with less than 10 isolates in the database are shown in  
1015 gray. Lineage 7 (not pictured) is found exclusively in Ethiopia.  
1016  
1017

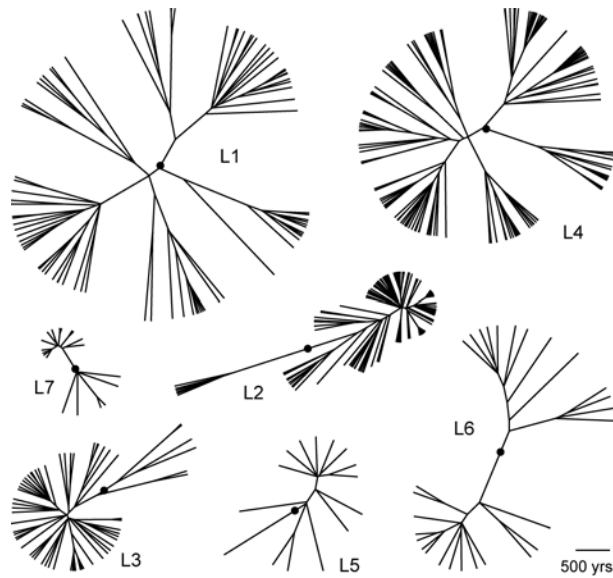

1018

1019 **Fig. 2.** Maximum clade credibility phylogenies of *Mycobacterium tuberculosis* lineages 1-6.

1020 Bayesian analyses were performed on each lineage alignment with the general time reversible

1021 model of nucleotide substitution with a gamma distribution to account for rate heterogeneity

1022 between sites, a strict molecular clock, and Bayesian skyline plot demographic models. The

1023 most recent common ancestor (MRCA) of each lineage is indicated with a black circle; the

1024 MRCA of individual lineage phylogenies were informed by the phylogeny of the entire Old World

1025 collection, which was dated using a substitution rate of  $5 \times 10^{-8}$  substitutions/site/year (Kay et al.

1026 2015).

1027



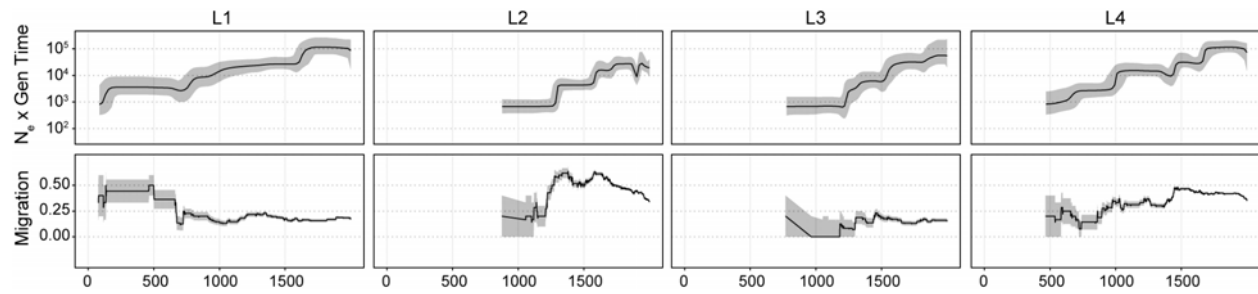

1028

1029

1030

1031

1032

1033

1034

1035

1036

1037

1038

**Fig. 3.** Patterns of effective population size and migration through time of *Mycobacterium tuberculosis* lineages 1-4. Bayesian skyline plots (top panels) show inferred changes in effective population size ( $N_e$ ) through time deduced from lineage specific analyses. Black lines denote median  $N_e$  and gray shading the 95% highest posterior density. Estimated migration through time (see *Methods*) for each lineage is shown in the bottom panels. Gray shading depicts the rates inferred after the addition or subtraction of a single migration event, and demonstrate the uncertainty of rate estimates, particularly from the early history of each lineage. Dates are shown in calendar years and are based on scaling the phylogeny of the Old World collection with a substitution rate of  $5 \times 10^{-8}$  substitutions/site/year (Kay et al. 2015).

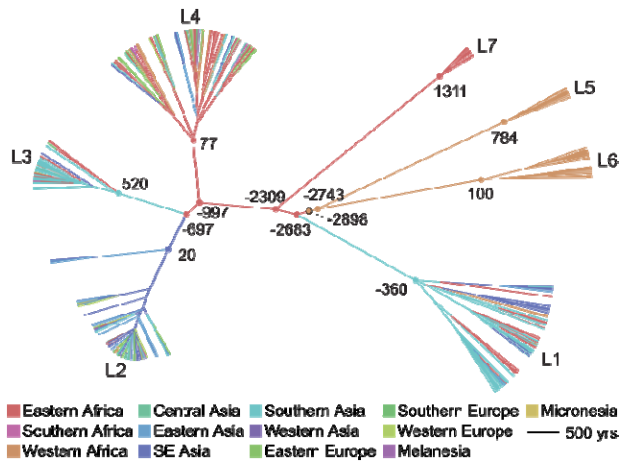

**Fig. 4.** Maximum clade credibility tree of the Old World collection. Estimated divergence dates are shown in calendar years based on median heights and a substitution rate of  $5 \times 10^{-8}$  substitutions/site/year (Kay et al. 2015). Branches are colored according to the inferred most probable geographic origin. Nodes corresponding to the most recent common ancestors (MRCA) of each lineage, lineage splits, and the MRCA of *M. tuberculosis* (outlined black) are marked with circles and colored to reflect their most probable geographic origin.

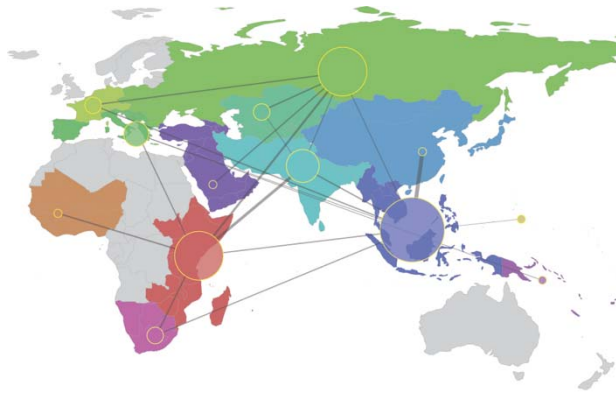

■ Eastern Africa ■ Central Asia ■ Southern Asia ■ Southern Europe ■ Micronesia  
■ Southern Africa ■ Eastern Asia ■ Western Asia ■ Western Europe ■ Unsampled  
■ Western Africa ■ SE Asia ■ Eastern Europe ■ Melanesia

1047

1048 **Fig. 5.** Connectivity of UN subregions during dispersal of *Mycobacterium tuberculosis*. The  
1049 Bayesian stochastic search variable selection method was used to identify and quantify  
1050 migrations with strong support in discrete phylogeographic analysis of the Old World collection.  
1051 Node sizes reflect the number of significant migrations emanating from the region observed in  
1052 the phylogeny, whereas the thickness of lines connecting regions reflects the estimated relative  
1053 rate between regions.

1054

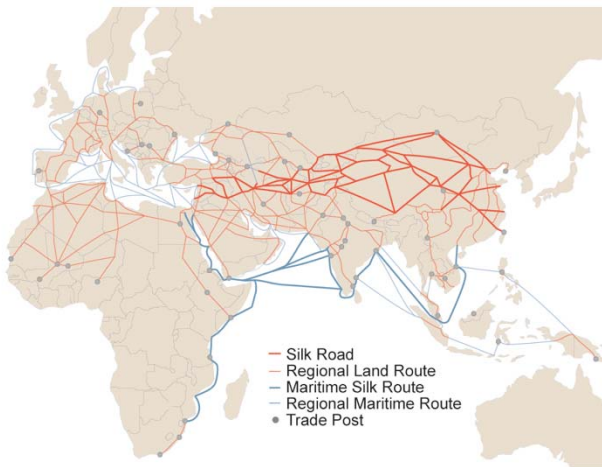

1055

1056 **Fig. 6.** Trade routes active throughout Europe, Africa and Asia by 1400 CE. Nodes (trade cities,  
1057 oases, and caravanserai) and arcs (the routes between nodes) are from the Old World Trade  
1058 Routes Project ([www.ciolek.com/owtrad.html](http://www.ciolek.com/owtrad.html), accessed February 17, 2016) and are visualized  
1059 with ArcGIS.

1060 **Table 1.** Genetic diversity of Old World *M.tb* across lineages 1-7. TMRCA estimates reflect  
 1061 scaling of results to evolutionary rates calibrated from ancient DNA [median  $5.00 \times 10^{-8}$   
 1062 substitutions/ site/ year (Kay et al. 2015) and are written as calendar years. To account for  
 1063 uncertainty in this rate estimate, our lower and upper TMRCA estimates reflect scaling of our  
 1064 results with the low and high bounds of the 95% highest posterior density estimates of the rate  
 1065 reported from ancient DNA analysis (i.e.  $4.06 \times 10^{-8}$  and  $5.87 \times 10^{-8}$ , respectively).

|                                       |                               | <i>MTBC</i> | <i>L1</i>   | <i>L4</i>   | <i>L2</i>   | <i>L3</i>   | <i>L5</i>   | <i>L6</i>   | <i>L7</i>   |
|---------------------------------------|-------------------------------|-------------|-------------|-------------|-------------|-------------|-------------|-------------|-------------|
| <i>Sample</i>                         | <i>n</i>                      | 552         | 89          | 143         | 181         | 65          | 15          | 31          | 28          |
| <i>Diversity</i>                      | □                             | 2.13E-03    | 7.56E-04    | 7.80E-04    | 4.49E-04    | 3.88E-04    | 1.72E-04    | 3.04E-04    | 7.99E-05    |
|                                       | π                             | 2.80E-04    | 1.92E-04    | 1.54E-04    | 7.46E-05    | 9.16E-05    | 8.77E-05    | 1.41E-04    | 4.52E-05    |
| <i>Demographic Inference</i>          | <i>N/Nanc</i>                 | 91 ± 4      | 71 ± 5      | 55 ± 22     | 112 ± 102   | 148 ± 2     | 504 ± 111   | 50 ± 5      | 17 ± 4      |
|                                       | <i>Generations (Nanc)</i>     | 0.16 ± 0.01 | 0.80 ± 0.06 | 0.65 ± 0.35 | 0.41 ± 0.94 | 3.54 ± 0.04 | 3.94 ± 0.73 | 1.10 ± 0.09 | 2.45 ± 0.89 |
|                                       | <i>LL expansion</i>           | -1788.4     | -424.2      | -492.8      | -467.1      | -108.2      | -42.4       | -151.9      | -64.5       |
|                                       | <i>LL neutral</i>             | -10549.2    | -3246.6     | -3474.6     | -2378.9     | -1717.0     | -520.7      | -912.3      | -159.4      |
|                                       | <i>p-value</i>                | 0.00        | 0.00        | 0.00        | 0.00        | 0.00        | 0.00        | 0.00        | 0.00        |
| <i>Structure UN subregions</i>        | <i>Var. Between</i>           | 21          | 19          | 4           | 20          | 16          | NA          | NA          | NA          |
|                                       | <i>Var. Within</i>            | 79          | 81          | 96          | 80          | 84          | NA          | NA          | NA          |
|                                       | <i>p-value</i>                | <0.001      | <0.001      | 0.001       | <0.001      | 0.004       | NA          | NA          | NA          |
| <i>Structure Botanical Continents</i> | <i>Var. Between</i>           | 14          | 5           | 2           | 9           | 13          | NA          | NA          | NA          |
|                                       | <i>Var. Within</i>            | 86          | 95          | 98          | 91          | 87          | NA          | NA          | NA          |
|                                       | <i>p-value</i>                | <0.001      | 0.02        | 0.05        | <0.001      | <0.001      | NA          | NA          | NA          |
| <i>TMRCA</i>                          | <i>median</i>                 | -2898       | -360        | 77          | -20         | 520         | 784         | 100         | 1311        |
|                                       | <i>lower</i>                  | -4032       | -906        | -368        | -488        | 177         | 502         | -339        | 1152        |
|                                       | <i>upper</i>                  | -2172       | -10         | 362         | 279         | 739         | 964         | 382         | 1413        |
| <i>Geographic origin</i>              | <i>1st region probability</i> | W Africa    | S Asia      | E Africa    | SE Asia     | S Asia      | W Africa    | W Africa    | E Africa    |
|                                       |                               | 54.2%       | 75.6%       | 98.9%       | 81.0%       | 63.5%       | 99.9%       | 99.8%       | 99.8%       |
|                                       | <i>2nd region probability</i> | E Africa    | E Africa    | E Europe    | E Asia      | E Africa    | E Africa    | E Africa    | S Africa    |
|                                       |                               | 37.5%       | 24.1%       | 0.7%        | 9.2%        | 36.2%       | 0.1%        | 0.2%        | 0.0%        |

1066
